# Supplementary material for: A global analysis of reconstructed land climate changes during Dansgaard-Oeschger events
Source: Copernicus journal article supplement (doi:10.5194/cp-2024-12), 2024-03-12

## **Supplementary Material: A global analysis of reconstructed land climate changes during Dansgaard-Oeschger events**

Mengmeng Liu<sup>1,2,\*</sup>, Iain Colin Prentice<sup>1</sup>, Sandy P. Harrison<sup>2</sup>

1: Georgina Mace Centre for the Living Planet, Department of Life Sciences, Imperial College London, Silwood Park Campus, Buckhurst Road, Ascot SL5 7PY, UK

2: Department of Geography and Environmental Science, University of Reading, Reading, RG6 6AB, UK

**\* Corresponding author: [m.liu18@imperial.ac.uk](mailto:m.liu18@imperial.ac.uk)**

Ms for: *Climate of the Past*

Figure S1: Comparison of plant-available moisture ( $\alpha$ ) values before and after the CO<sub>2</sub> correction. The red line is the 1:1 line.

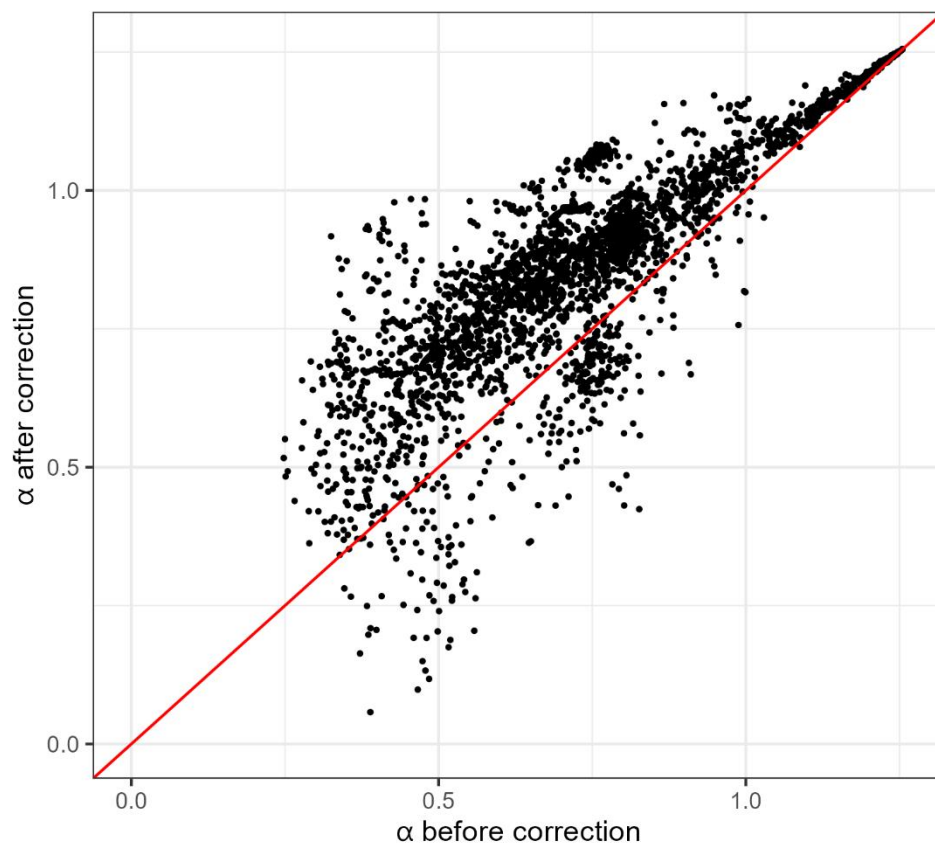

Figure S2: Maps showing the site-based reconstructions of the change in mean temperature of the coldest month ( $\Delta\text{MTCO}$ ) during individual Dansgaard-Oeschger (D-O) events.

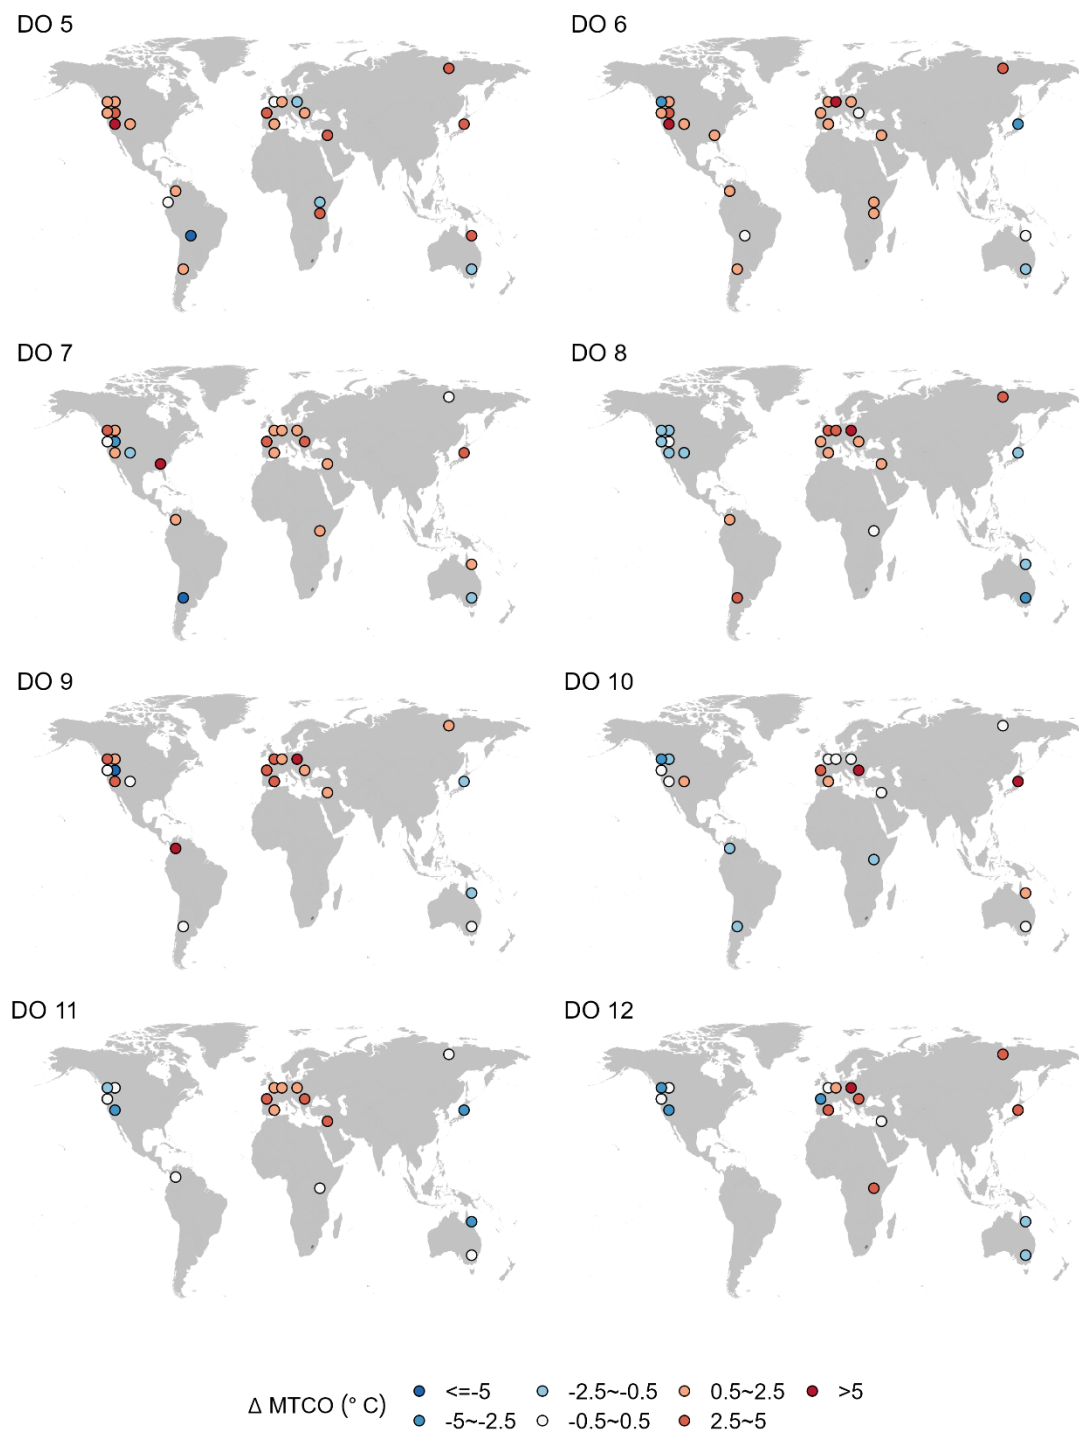

Figure S3: Maps showing the site-based reconstructions of the change in mean temperature of the warmest month ( $\Delta$ MTWA) during individual Dansgaard-Oeschger (D-O) events.

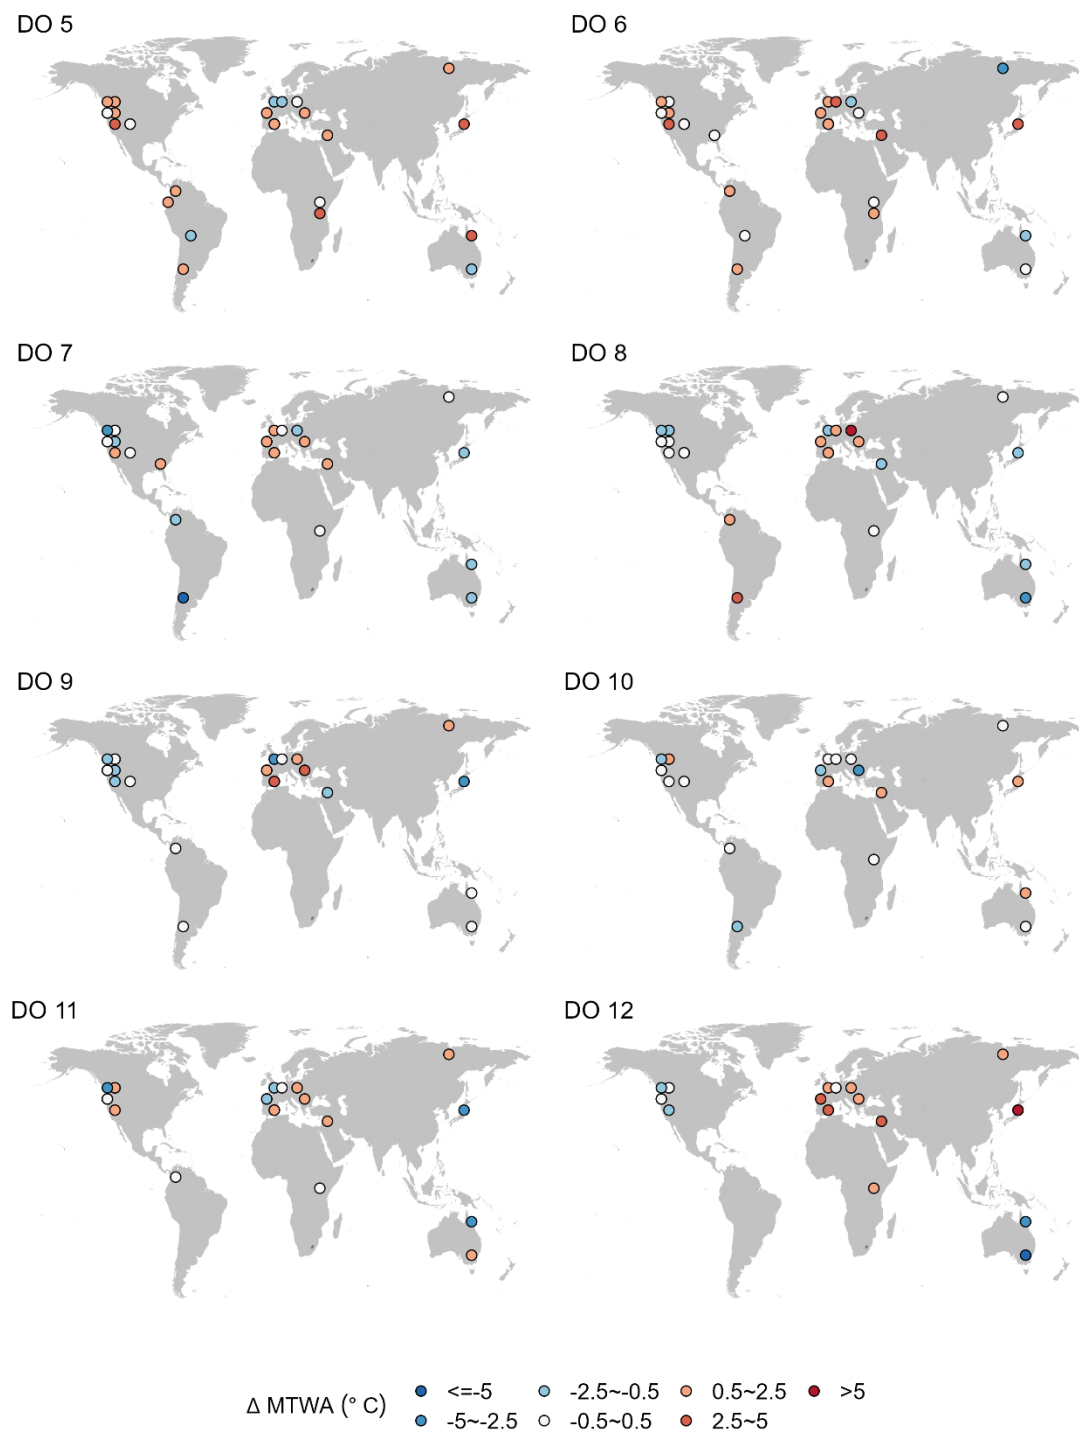

Figure S4: Maps showing the site-based reconstructions of the change in plant-available moisture ( $\Delta\alpha$ ) during individual Dansgaard-Oeschger (D-O) events.

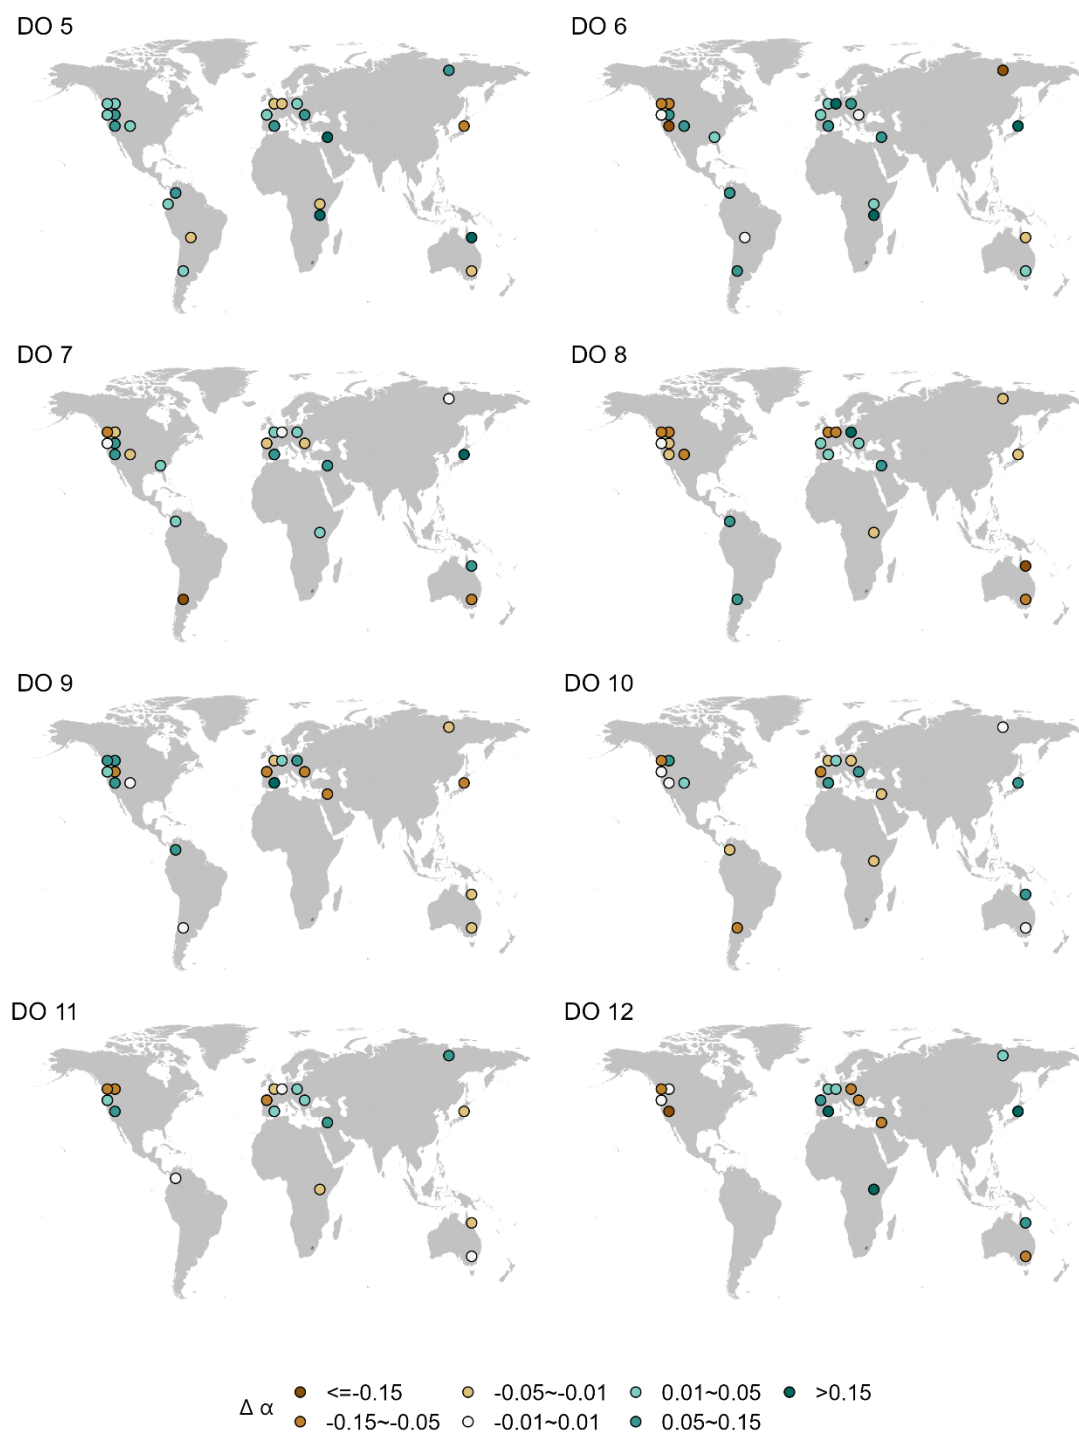

Supplement: Supplementary file 1 [file cp-2024-12-supplement.pdf]
